# Supplementary material
Source: PubMed Central journal article supplement (PMC4250352)

Sup. Fig. 1. Isolation of Erythroid Subsets.

Dcr-del animals were treated with a single dose of PHZ (100mg/kg, IP). Four days after treatment, mice were sacrificed and splenocytes were isolated. Staining for CD44, Ter119 and gating strategies were performed as previously described [24]. Using an Aria

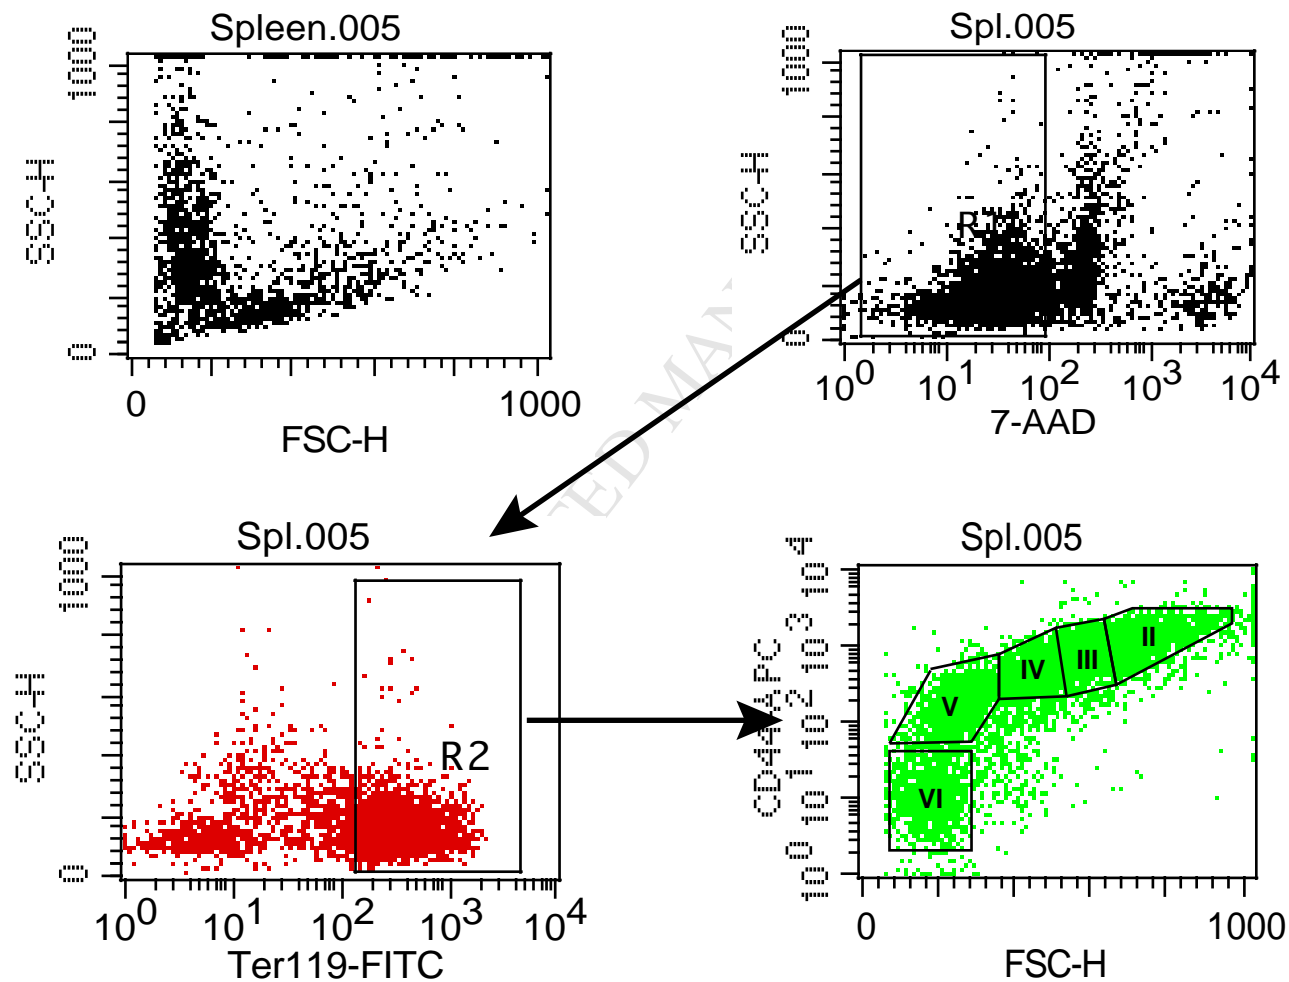

Supplement: NIHMS608589-supplement-01.pdf [file NIHMS608589-supplement-01.pdf]
